## Correction: Upregulation of microRNA135a-3p and death receptor 5 plays a critical role in Tanshinone I sensitized prostate cancer cells to TRAIL induced apoptosis

Eun Ah Shin<sup>1,\*</sup>, Eun Jung Sohn<sup>1,\*</sup>, Gunho Won<sup>1</sup>, Jeong-Un Choi<sup>1</sup>, Myongsuk Jeong<sup>1</sup>, Bonglee Kim<sup>1</sup>, Min-Jeong Kim<sup>1</sup> and Sung-Hoon Kim<sup>1</sup>

<sup>1</sup> Cancer Preventive Material Development Research Center, College of Oriental Medicine, Kyung Hee University, Seoul, South Korea

\*These authors equally contributed to this work

Published: July 17, 2018

Copyright: Shin et al. This is an open-access article distributed under the terms of the Creative Commons Attribution License 3.0 (CC BY 3.0), which permits unrestricted use, distribution, and reproduction in any medium, provided the original author and source are credited.

**This article has been corrected:** An identical set of Bcl2 bands was mistakenly shown for both the PC-3 and DU145 cells in Figure 2C. The corrected figure for DU145 cells is given below. The authors provided an original Western blot for DU145 cells and declare that these corrections do not change the results or conclusions of this paper.

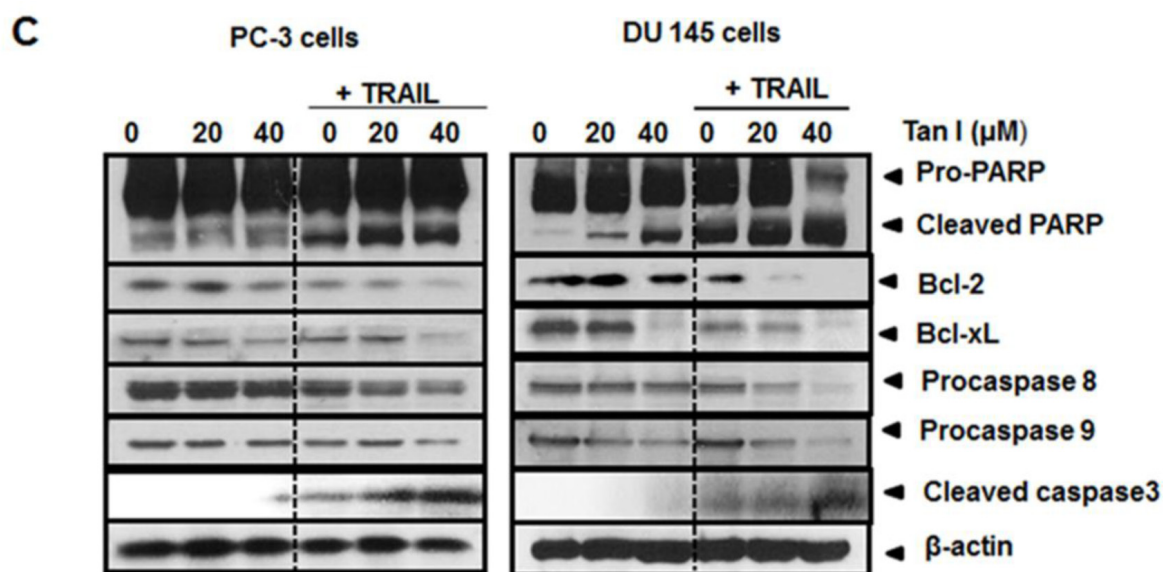

**Figure 2: (C) Effect of Tanshinone I and/or TRAIL on apoptotic proteins in PC-3 and DU145 cells.** PC-3 and DU145 cells were treated in the absence or presence of Tanshinone I (20, 40 μM) and/ or TRAIL (25 ng/ml) for 24 h. Western blotting was subjected for PARP, procaspase 8, procaspase 9, cleaved caspase3, Bcl-2, Bcl-xL, and β-Actin was used as the internal control.

Original article: Oncotarget. 2014; 5:5624-5636. <https://doi.org/10.18632/oncotarget.2152>
